# Supplementary material for: Association of Cardiovascular Health Metrics and Mortality Among Individuals With and Without Cancer
Source: PubMed Central journal article supplement — J Am Heart Assoc. 2024 Feb 23;13(5):e032683. doi: 10.1161/JAHA.123.032683 (PMC10944047; doi:10.1161/jaha.123.032683), 2024-02-23
Supplement: JAH3-13-e032683-s001.pdf [file JAH3-13-e032683-s001.pdf]

# **SUPPLEMENTAL MATERIAL**

**Table S1. Definition and scoring approach for quantifying cardiovascular health, as per the American Heart Association’s Life’s Essential 8 score, as applied in the National Health and Nutrition Examination Surveys.**

| <p>Health behaviors</p> | <p><b>Physical activity</b></p>                             | <p><b>Measurement:</b> Self-reported minutes of moderate or vigorous physical activity per week.</p> <p><b>Example tools for measurement:</b> NHANES PAQ-K questionnaire.</p>       | <p><b>Metric:</b> Minutes of moderate (or greater) intensity activity per week.</p> <p><b>Scoring:</b></p> <table border="1" data-bbox="959 555 1174 824"> <thead> <tr> <th>Points</th> <th>Minutes</th> </tr> </thead> <tbody> <tr> <td>100</td> <td>&gt;150</td> </tr> <tr> <td>90</td> <td>120-149</td> </tr> <tr> <td>80</td> <td>90-119</td> </tr> <tr> <td>60</td> <td>60-89</td> </tr> <tr> <td>40</td> <td>30-59</td> </tr> <tr> <td>20</td> <td>1-29</td> </tr> <tr> <td>0</td> <td>0</td> </tr> </tbody> </table>                                                                                                                                               | Points | Minutes | 100 | >150         | 90 | 120-149                    | 80 | 90-119                  | 60 | 60-89                                                       | 40 | 30-59          | 20 | 1-29 | 0 | 0 |
|-------------------------|-------------------------------------------------------------|-------------------------------------------------------------------------------------------------------------------------------------------------------------------------------------|---------------------------------------------------------------------------------------------------------------------------------------------------------------------------------------------------------------------------------------------------------------------------------------------------------------------------------------------------------------------------------------------------------------------------------------------------------------------------------------------------------------------------------------------------------------------------------------------------------------------------------------------------------------------------|--------|---------|-----|--------------|----|----------------------------|----|-------------------------|----|-------------------------------------------------------------|----|----------------|----|------|---|---|
| Points                  | Minutes                                                     |                                                                                                                                                                                     |                                                                                                                                                                                                                                                                                                                                                                                                                                                                                                                                                                                                                                                                           |        |         |     |              |    |                            |    |                         |    |                                                             |    |                |    |      |   |   |
| 100                     | >150                                                        |                                                                                                                                                                                     |                                                                                                                                                                                                                                                                                                                                                                                                                                                                                                                                                                                                                                                                           |        |         |     |              |    |                            |    |                         |    |                                                             |    |                |    |      |   |   |
| 90                      | 120-149                                                     |                                                                                                                                                                                     |                                                                                                                                                                                                                                                                                                                                                                                                                                                                                                                                                                                                                                                                           |        |         |     |              |    |                            |    |                         |    |                                                             |    |                |    |      |   |   |
| 80                      | 90-119                                                      |                                                                                                                                                                                     |                                                                                                                                                                                                                                                                                                                                                                                                                                                                                                                                                                                                                                                                           |        |         |     |              |    |                            |    |                         |    |                                                             |    |                |    |      |   |   |
| 60                      | 60-89                                                       |                                                                                                                                                                                     |                                                                                                                                                                                                                                                                                                                                                                                                                                                                                                                                                                                                                                                                           |        |         |     |              |    |                            |    |                         |    |                                                             |    |                |    |      |   |   |
| 40                      | 30-59                                                       |                                                                                                                                                                                     |                                                                                                                                                                                                                                                                                                                                                                                                                                                                                                                                                                                                                                                                           |        |         |     |              |    |                            |    |                         |    |                                                             |    |                |    |      |   |   |
| 20                      | 1-29                                                        |                                                                                                                                                                                     |                                                                                                                                                                                                                                                                                                                                                                                                                                                                                                                                                                                                                                                                           |        |         |     |              |    |                            |    |                         |    |                                                             |    |                |    |      |   |   |
| 0                       | 0                                                           |                                                                                                                                                                                     |                                                                                                                                                                                                                                                                                                                                                                                                                                                                                                                                                                                                                                                                           |        |         |     |              |    |                            |    |                         |    |                                                             |    |                |    |      |   |   |
|                         | <p><b>Nicotine exposure</b></p>                             | <p><b>Measurement:</b> Self-reported use of cigarettes or inhaled nicotine delivery system.</p> <p><b>Example tools for measurement:</b> NHANES SMQ questionnaire.</p>              | <p><b>Metric:</b> Combustible tobacco use and/or inhaled NDS use; or secondhand smoke exposure</p> <p><b>Scoring:</b></p> <table border="1" data-bbox="959 987 1422 1256"> <thead> <tr> <th>Points</th> <th>Status</th> </tr> </thead> <tbody> <tr> <td>100</td> <td>Never smoker</td> </tr> <tr> <td>75</td> <td>Former smoker, quit ≥5 yrs</td> </tr> <tr> <td>50</td> <td>Former smoker, quit 1 -</td> </tr> <tr> <td>25</td> <td>Former smoker, quit &lt;1 year, or currently using inhaled NDS</td> </tr> <tr> <td>0</td> <td>Current smoker</td> </tr> </tbody> </table> <p>Subtract 20 points (unless score is 0) for living with active indoor smoker in home</p> | Points | Status  | 100 | Never smoker | 75 | Former smoker, quit ≥5 yrs | 50 | Former smoker, quit 1 - | 25 | Former smoker, quit <1 year, or currently using inhaled NDS | 0  | Current smoker |    |      |   |   |
| Points                  | Status                                                      |                                                                                                                                                                                     |                                                                                                                                                                                                                                                                                                                                                                                                                                                                                                                                                                                                                                                                           |        |         |     |              |    |                            |    |                         |    |                                                             |    |                |    |      |   |   |
| 100                     | Never smoker                                                |                                                                                                                                                                                     |                                                                                                                                                                                                                                                                                                                                                                                                                                                                                                                                                                                                                                                                           |        |         |     |              |    |                            |    |                         |    |                                                             |    |                |    |      |   |   |
| 75                      | Former smoker, quit ≥5 yrs                                  |                                                                                                                                                                                     |                                                                                                                                                                                                                                                                                                                                                                                                                                                                                                                                                                                                                                                                           |        |         |     |              |    |                            |    |                         |    |                                                             |    |                |    |      |   |   |
| 50                      | Former smoker, quit 1 -                                     |                                                                                                                                                                                     |                                                                                                                                                                                                                                                                                                                                                                                                                                                                                                                                                                                                                                                                           |        |         |     |              |    |                            |    |                         |    |                                                             |    |                |    |      |   |   |
| 25                      | Former smoker, quit <1 year, or currently using inhaled NDS |                                                                                                                                                                                     |                                                                                                                                                                                                                                                                                                                                                                                                                                                                                                                                                                                                                                                                           |        |         |     |              |    |                            |    |                         |    |                                                             |    |                |    |      |   |   |
| 0                       | Current smoker                                              |                                                                                                                                                                                     |                                                                                                                                                                                                                                                                                                                                                                                                                                                                                                                                                                                                                                                                           |        |         |     |              |    |                            |    |                         |    |                                                             |    |                |    |      |   |   |
|                         | <p><b>Sleep health</b></p>                                  | <p><b>Measurement:</b> Self-reported average hours of sleep per night.</p> <p><b>Example tools for measurement:</b> “On average, how many hours of sleep do you get per night?”</p> | <p><b>Metric:</b> Average hours of sleep per night</p> <p><b>Scoring:</b></p> <table border="1" data-bbox="959 1453 1230 1691"> <thead> <tr> <th>Points</th> <th>Hours</th> </tr> </thead> <tbody> <tr> <td>100</td> <td>7-&lt;9</td> </tr> <tr> <td>90</td> <td>9-&lt;10</td> </tr> <tr> <td>70</td> <td>6-&lt;7</td> </tr> <tr> <td>40</td> <td>5-&lt;6 or ≥10</td> </tr> <tr> <td>20</td> <td>4-&lt;5</td> </tr> <tr> <td>0</td> <td>&lt;4</td> </tr> </tbody> </table>                                                                                                                                                                                                | Points | Hours   | 100 | 7-<9         | 90 | 9-<10                      | 70 | 6-<7                    | 40 | 5-<6 or ≥10                                                 | 20 | 4-<5           | 0  | <4   |   |   |
| Points                  | Hours                                                       |                                                                                                                                                                                     |                                                                                                                                                                                                                                                                                                                                                                                                                                                                                                                                                                                                                                                                           |        |         |     |              |    |                            |    |                         |    |                                                             |    |                |    |      |   |   |
| 100                     | 7-<9                                                        |                                                                                                                                                                                     |                                                                                                                                                                                                                                                                                                                                                                                                                                                                                                                                                                                                                                                                           |        |         |     |              |    |                            |    |                         |    |                                                             |    |                |    |      |   |   |
| 90                      | 9-<10                                                       |                                                                                                                                                                                     |                                                                                                                                                                                                                                                                                                                                                                                                                                                                                                                                                                                                                                                                           |        |         |     |              |    |                            |    |                         |    |                                                             |    |                |    |      |   |   |
| 70                      | 6-<7                                                        |                                                                                                                                                                                     |                                                                                                                                                                                                                                                                                                                                                                                                                                                                                                                                                                                                                                                                           |        |         |     |              |    |                            |    |                         |    |                                                             |    |                |    |      |   |   |
| 40                      | 5-<6 or ≥10                                                 |                                                                                                                                                                                     |                                                                                                                                                                                                                                                                                                                                                                                                                                                                                                                                                                                                                                                                           |        |         |     |              |    |                            |    |                         |    |                                                             |    |                |    |      |   |   |
| 20                      | 4-<5                                                        |                                                                                                                                                                                     |                                                                                                                                                                                                                                                                                                                                                                                                                                                                                                                                                                                                                                                                           |        |         |     |              |    |                            |    |                         |    |                                                             |    |                |    |      |   |   |
| 0                       | <4                                                          |                                                                                                                                                                                     |                                                                                                                                                                                                                                                                                                                                                                                                                                                                                                                                                                                                                                                                           |        |         |     |              |    |                            |    |                         |    |                                                             |    |                |    |      |   |   |
|                         | <p><b>Healthy Diet</b></p>                                  | <p><b>Measurement:</b> Self-assessment of healthy diet.</p> <p><b>Example tools for measurement:</b> NHANES DBQ questionnaire.</p>                                                  | <p><b>Metric:</b> Self-assessment of diet</p> <p><b>Scoring:</b></p> <table border="1" data-bbox="959 1789 1402 1989"> <thead> <tr> <th>Points</th> <th>Status</th> </tr> </thead> <tbody> <tr> <td>100</td> <td>Excellent</td> </tr> <tr> <td>75</td> <td>Very good</td> </tr> <tr> <td>50</td> <td>Good</td> </tr> <tr> <td>25</td> <td>Fair</td> </tr> <tr> <td>0</td> <td>Poor</td> </tr> </tbody> </table>                                                                                                                                                                                                                                                           | Points | Status  | 100 | Excellent    | 75 | Very good                  | 50 | Good                    | 25 | Fair                                                        | 0  | Poor           |    |      |   |   |
| Points                  | Status                                                      |                                                                                                                                                                                     |                                                                                                                                                                                                                                                                                                                                                                                                                                                                                                                                                                                                                                                                           |        |         |     |              |    |                            |    |                         |    |                                                             |    |                |    |      |   |   |
| 100                     | Excellent                                                   |                                                                                                                                                                                     |                                                                                                                                                                                                                                                                                                                                                                                                                                                                                                                                                                                                                                                                           |        |         |     |              |    |                            |    |                         |    |                                                             |    |                |    |      |   |   |
| 75                      | Very good                                                   |                                                                                                                                                                                     |                                                                                                                                                                                                                                                                                                                                                                                                                                                                                                                                                                                                                                                                           |        |         |     |              |    |                            |    |                         |    |                                                             |    |                |    |      |   |   |
| 50                      | Good                                                        |                                                                                                                                                                                     |                                                                                                                                                                                                                                                                                                                                                                                                                                                                                                                                                                                                                                                                           |        |         |     |              |    |                            |    |                         |    |                                                             |    |                |    |      |   |   |
| 25                      | Fair                                                        |                                                                                                                                                                                     |                                                                                                                                                                                                                                                                                                                                                                                                                                                                                                                                                                                                                                                                           |        |         |     |              |    |                            |    |                         |    |                                                             |    |                |    |      |   |   |
| 0                       | Poor                                                        |                                                                                                                                                                                     |                                                                                                                                                                                                                                                                                                                                                                                                                                                                                                                                                                                                                                                                           |        |         |     |              |    |                            |    |                         |    |                                                             |    |                |    |      |   |   |

| Health Factors        | <b>Body mass Index</b>                                                                                                                                                                | <p><b>Measurement:</b> Body weight (kg) divided by height squared (<math>m^2</math>)</p> <p><b>Example tools for measurement:</b> Objective measurement of height and weight</p>                                                                                                                                                                                                                                                                                                                                                                                                                                                                                                                                    | <p><b>Metric:</b> Body mass index (<math>kg/m^2</math>)</p> <p><b>Scoring:</b></p> <table border="1"> <thead> <tr> <th>Points</th> <th>BMI</th> </tr> </thead> <tbody> <tr> <td>100</td> <td>&lt;25.0</td> </tr> <tr> <td>70</td> <td>25.0-29.9</td> </tr> <tr> <td>30</td> <td>30.0-34.9</td> </tr> <tr> <td>15</td> <td>35.0-39.9</td> </tr> <tr> <td>0</td> <td><math>\geq 40.0</math></td> </tr> </tbody> </table> | Points | BMI | 100                                       | <25.0 | 70                                                              | 25.0-29.9 | 30                             | 30.0-34.9 | 15                          | 35.0-39.9 | 0                           | $\geq 40.0$ |                             |   |                                 |
|-----------------------|---------------------------------------------------------------------------------------------------------------------------------------------------------------------------------------|---------------------------------------------------------------------------------------------------------------------------------------------------------------------------------------------------------------------------------------------------------------------------------------------------------------------------------------------------------------------------------------------------------------------------------------------------------------------------------------------------------------------------------------------------------------------------------------------------------------------------------------------------------------------------------------------------------------------|------------------------------------------------------------------------------------------------------------------------------------------------------------------------------------------------------------------------------------------------------------------------------------------------------------------------------------------------------------------------------------------------------------------------|--------|-----|-------------------------------------------|-------|-----------------------------------------------------------------|-----------|--------------------------------|-----------|-----------------------------|-----------|-----------------------------|-------------|-----------------------------|---|---------------------------------|
|                       | Points                                                                                                                                                                                | BMI                                                                                                                                                                                                                                                                                                                                                                                                                                                                                                                                                                                                                                                                                                                 |                                                                                                                                                                                                                                                                                                                                                                                                                        |        |     |                                           |       |                                                                 |           |                                |           |                             |           |                             |             |                             |   |                                 |
|                       | 100                                                                                                                                                                                   | <25.0                                                                                                                                                                                                                                                                                                                                                                                                                                                                                                                                                                                                                                                                                                               |                                                                                                                                                                                                                                                                                                                                                                                                                        |        |     |                                           |       |                                                                 |           |                                |           |                             |           |                             |             |                             |   |                                 |
|                       | 70                                                                                                                                                                                    | 25.0-29.9                                                                                                                                                                                                                                                                                                                                                                                                                                                                                                                                                                                                                                                                                                           |                                                                                                                                                                                                                                                                                                                                                                                                                        |        |     |                                           |       |                                                                 |           |                                |           |                             |           |                             |             |                             |   |                                 |
| 30                    | 30.0-34.9                                                                                                                                                                             |                                                                                                                                                                                                                                                                                                                                                                                                                                                                                                                                                                                                                                                                                                                     |                                                                                                                                                                                                                                                                                                                                                                                                                        |        |     |                                           |       |                                                                 |           |                                |           |                             |           |                             |             |                             |   |                                 |
| 15                    | 35.0-39.9                                                                                                                                                                             |                                                                                                                                                                                                                                                                                                                                                                                                                                                                                                                                                                                                                                                                                                                     |                                                                                                                                                                                                                                                                                                                                                                                                                        |        |     |                                           |       |                                                                 |           |                                |           |                             |           |                             |             |                             |   |                                 |
| 0                     | $\geq 40.0$                                                                                                                                                                           |                                                                                                                                                                                                                                                                                                                                                                                                                                                                                                                                                                                                                                                                                                                     |                                                                                                                                                                                                                                                                                                                                                                                                                        |        |     |                                           |       |                                                                 |           |                                |           |                             |           |                             |             |                             |   |                                 |
| <b>Blood lipids</b>   | <p><b>Measurement:</b> Plasma total and HDL-cholesterol with calculation of non-HDL-cholesterol.</p> <p><b>Example tools for measurement:</b> Fasting or non-fasting blood sample</p> | <p><b>Metric:</b> Non-HDL-cholesterol (mg/dL).</p> <p><b>Scoring:</b></p> <table border="1"> <thead> <tr> <th>Points</th> <th>Level</th> </tr> </thead> <tbody> <tr> <td>100</td> <td>&lt;130</td> </tr> <tr> <td>60</td> <td>130-159</td> </tr> <tr> <td>40</td> <td>160-189</td> </tr> <tr> <td>20</td> <td>190-219</td> </tr> <tr> <td>0</td> <td><math>\geq 220</math></td> </tr> </tbody> </table> <p>If drug-treated level, subtract 20 points</p>                                                                                                                                                                                                                                                            | Points                                                                                                                                                                                                                                                                                                                                                                                                                 | Level  | 100 | <130                                      | 60    | 130-159                                                         | 40        | 160-189                        | 20        | 190-219                     | 0         | $\geq 220$                  |             |                             |   |                                 |
| Points                | Level                                                                                                                                                                                 |                                                                                                                                                                                                                                                                                                                                                                                                                                                                                                                                                                                                                                                                                                                     |                                                                                                                                                                                                                                                                                                                                                                                                                        |        |     |                                           |       |                                                                 |           |                                |           |                             |           |                             |             |                             |   |                                 |
| 100                   | <130                                                                                                                                                                                  |                                                                                                                                                                                                                                                                                                                                                                                                                                                                                                                                                                                                                                                                                                                     |                                                                                                                                                                                                                                                                                                                                                                                                                        |        |     |                                           |       |                                                                 |           |                                |           |                             |           |                             |             |                             |   |                                 |
| 60                    | 130-159                                                                                                                                                                               |                                                                                                                                                                                                                                                                                                                                                                                                                                                                                                                                                                                                                                                                                                                     |                                                                                                                                                                                                                                                                                                                                                                                                                        |        |     |                                           |       |                                                                 |           |                                |           |                             |           |                             |             |                             |   |                                 |
| 40                    | 160-189                                                                                                                                                                               |                                                                                                                                                                                                                                                                                                                                                                                                                                                                                                                                                                                                                                                                                                                     |                                                                                                                                                                                                                                                                                                                                                                                                                        |        |     |                                           |       |                                                                 |           |                                |           |                             |           |                             |             |                             |   |                                 |
| 20                    | 190-219                                                                                                                                                                               |                                                                                                                                                                                                                                                                                                                                                                                                                                                                                                                                                                                                                                                                                                                     |                                                                                                                                                                                                                                                                                                                                                                                                                        |        |     |                                           |       |                                                                 |           |                                |           |                             |           |                             |             |                             |   |                                 |
| 0                     | $\geq 220$                                                                                                                                                                            |                                                                                                                                                                                                                                                                                                                                                                                                                                                                                                                                                                                                                                                                                                                     |                                                                                                                                                                                                                                                                                                                                                                                                                        |        |     |                                           |       |                                                                 |           |                                |           |                             |           |                             |             |                             |   |                                 |
| <b>Blood glucose</b>  | <p><b>Measurement:</b> Fasting blood glucose or casual hemoglobin A1c.</p> <p><b>Example tools for measurement:</b> Fasting (FBG, HbA1c) or non fasting (HbA1c) blood sample</p>      | <p><b>Metric:</b> Fasting blood glucose (mg/dL) or Hemoglobin A1c (%)</p> <p><b>Scoring:</b></p> <table border="1"> <thead> <tr> <th>Points</th> <th>Level</th> </tr> </thead> <tbody> <tr> <td>100</td> <td>No diabetes and FBG &lt;100 (or HbA1c &lt; 5.7)</td> </tr> <tr> <td>60</td> <td>No diabetes and FBG 100 – 125 (or HbA1c 5.7-6.4) (Pre-diabetes)</td> </tr> <tr> <td>40</td> <td>Diabetes with HbA1c &lt;7.0</td> </tr> <tr> <td>30</td> <td>Diabetes with HbA1c 7.0-7.9</td> </tr> <tr> <td>20</td> <td>Diabetes with HbA1c 8.0-8.9</td> </tr> <tr> <td>10</td> <td>Diabetes with HbA1c 9.0-9.9</td> </tr> <tr> <td>0</td> <td>Diabetes with HbA1c <math>\geq 10.0</math></td> </tr> </tbody> </table> | Points                                                                                                                                                                                                                                                                                                                                                                                                                 | Level  | 100 | No diabetes and FBG <100 (or HbA1c < 5.7) | 60    | No diabetes and FBG 100 – 125 (or HbA1c 5.7-6.4) (Pre-diabetes) | 40        | Diabetes with HbA1c <7.0       | 30        | Diabetes with HbA1c 7.0-7.9 | 20        | Diabetes with HbA1c 8.0-8.9 | 10          | Diabetes with HbA1c 9.0-9.9 | 0 | Diabetes with HbA1c $\geq 10.0$ |
| Points                | Level                                                                                                                                                                                 |                                                                                                                                                                                                                                                                                                                                                                                                                                                                                                                                                                                                                                                                                                                     |                                                                                                                                                                                                                                                                                                                                                                                                                        |        |     |                                           |       |                                                                 |           |                                |           |                             |           |                             |             |                             |   |                                 |
| 100                   | No diabetes and FBG <100 (or HbA1c < 5.7)                                                                                                                                             |                                                                                                                                                                                                                                                                                                                                                                                                                                                                                                                                                                                                                                                                                                                     |                                                                                                                                                                                                                                                                                                                                                                                                                        |        |     |                                           |       |                                                                 |           |                                |           |                             |           |                             |             |                             |   |                                 |
| 60                    | No diabetes and FBG 100 – 125 (or HbA1c 5.7-6.4) (Pre-diabetes)                                                                                                                       |                                                                                                                                                                                                                                                                                                                                                                                                                                                                                                                                                                                                                                                                                                                     |                                                                                                                                                                                                                                                                                                                                                                                                                        |        |     |                                           |       |                                                                 |           |                                |           |                             |           |                             |             |                             |   |                                 |
| 40                    | Diabetes with HbA1c <7.0                                                                                                                                                              |                                                                                                                                                                                                                                                                                                                                                                                                                                                                                                                                                                                                                                                                                                                     |                                                                                                                                                                                                                                                                                                                                                                                                                        |        |     |                                           |       |                                                                 |           |                                |           |                             |           |                             |             |                             |   |                                 |
| 30                    | Diabetes with HbA1c 7.0-7.9                                                                                                                                                           |                                                                                                                                                                                                                                                                                                                                                                                                                                                                                                                                                                                                                                                                                                                     |                                                                                                                                                                                                                                                                                                                                                                                                                        |        |     |                                           |       |                                                                 |           |                                |           |                             |           |                             |             |                             |   |                                 |
| 20                    | Diabetes with HbA1c 8.0-8.9                                                                                                                                                           |                                                                                                                                                                                                                                                                                                                                                                                                                                                                                                                                                                                                                                                                                                                     |                                                                                                                                                                                                                                                                                                                                                                                                                        |        |     |                                           |       |                                                                 |           |                                |           |                             |           |                             |             |                             |   |                                 |
| 10                    | Diabetes with HbA1c 9.0-9.9                                                                                                                                                           |                                                                                                                                                                                                                                                                                                                                                                                                                                                                                                                                                                                                                                                                                                                     |                                                                                                                                                                                                                                                                                                                                                                                                                        |        |     |                                           |       |                                                                 |           |                                |           |                             |           |                             |             |                             |   |                                 |
| 0                     | Diabetes with HbA1c $\geq 10.0$                                                                                                                                                       |                                                                                                                                                                                                                                                                                                                                                                                                                                                                                                                                                                                                                                                                                                                     |                                                                                                                                                                                                                                                                                                                                                                                                                        |        |     |                                           |       |                                                                 |           |                                |           |                             |           |                             |             |                             |   |                                 |
| <b>Blood pressure</b> | <p><b>Measurement:</b> Appropriately measured systolic and diastolic blood pressure.</p> <p><b>Example tools for measurement:</b> Appropriately sized blood pressure cuff</p>         | <p><b>Metric:</b> Systolic and diastolic blood pressure (mm Hg).</p> <p><b>Scoring:</b></p> <table border="1"> <thead> <tr> <th>Points</th> <th>Status</th> </tr> </thead> <tbody> <tr> <td>100</td> <td>&lt;120/&lt;80 (Optimal)</td> </tr> <tr> <td>75</td> <td>120-129/&lt;80 (Elevated)</td> </tr> <tr> <td>50</td> <td>130-139 or 80-89 (Stage I HTN)</td> </tr> <tr> <td>25</td> <td>140-159 or 90-99</td> </tr> <tr> <td>0</td> <td><math>\geq 160</math> or <math>\geq 100</math></td> </tr> </tbody> </table> <p>If drug-treated level, subtract 20 points</p>                                                                                                                                             | Points                                                                                                                                                                                                                                                                                                                                                                                                                 | Status | 100 | <120/<80 (Optimal)                        | 75    | 120-129/<80 (Elevated)                                          | 50        | 130-139 or 80-89 (Stage I HTN) | 25        | 140-159 or 90-99            | 0         | $\geq 160$ or $\geq 100$    |             |                             |   |                                 |
| Points                | Status                                                                                                                                                                                |                                                                                                                                                                                                                                                                                                                                                                                                                                                                                                                                                                                                                                                                                                                     |                                                                                                                                                                                                                                                                                                                                                                                                                        |        |     |                                           |       |                                                                 |           |                                |           |                             |           |                             |             |                             |   |                                 |
| 100                   | <120/<80 (Optimal)                                                                                                                                                                    |                                                                                                                                                                                                                                                                                                                                                                                                                                                                                                                                                                                                                                                                                                                     |                                                                                                                                                                                                                                                                                                                                                                                                                        |        |     |                                           |       |                                                                 |           |                                |           |                             |           |                             |             |                             |   |                                 |
| 75                    | 120-129/<80 (Elevated)                                                                                                                                                                |                                                                                                                                                                                                                                                                                                                                                                                                                                                                                                                                                                                                                                                                                                                     |                                                                                                                                                                                                                                                                                                                                                                                                                        |        |     |                                           |       |                                                                 |           |                                |           |                             |           |                             |             |                             |   |                                 |
| 50                    | 130-139 or 80-89 (Stage I HTN)                                                                                                                                                        |                                                                                                                                                                                                                                                                                                                                                                                                                                                                                                                                                                                                                                                                                                                     |                                                                                                                                                                                                                                                                                                                                                                                                                        |        |     |                                           |       |                                                                 |           |                                |           |                             |           |                             |             |                             |   |                                 |
| 25                    | 140-159 or 90-99                                                                                                                                                                      |                                                                                                                                                                                                                                                                                                                                                                                                                                                                                                                                                                                                                                                                                                                     |                                                                                                                                                                                                                                                                                                                                                                                                                        |        |     |                                           |       |                                                                 |           |                                |           |                             |           |                             |             |                             |   |                                 |
| 0                     | $\geq 160$ or $\geq 100$                                                                                                                                                              |                                                                                                                                                                                                                                                                                                                                                                                                                                                                                                                                                                                                                                                                                                                     |                                                                                                                                                                                                                                                                                                                                                                                                                        |        |     |                                           |       |                                                                 |           |                                |           |                             |           |                             |             |                             |   |                                 |

**Table S2. Prevalence of LE8 Scores for Health Factors and Health Behaviors in Individuals with and without cancer.**

|                                        | No Cancer<br>(n=20,215) | Any Cancer<br>(n=1,752) | P value |
|----------------------------------------|-------------------------|-------------------------|---------|
| <b>Overall LE8 scores</b>              |                         |                         |         |
| Low LE8 Score, %(N)                    | 12.9% (2,608)           | 15.4% (270)             | <0.001  |
| Moderate LE8 Score, %(N)               | 70.1% (14,171)          | 74.8% (1,310)           |         |
| High LE8 Score, %(N)                   | 17.0% (3,437)           | 9.8% (172)              |         |
| <b>Health factors score</b>            |                         |                         |         |
| Low health factors score, %(N)         | 29.3% (5,931)           | 38.0% (666)             | <0.001  |
| Moderate health factors score, %(N)    | 51.2% (10,356)          | 52.3% (916)             |         |
| High health factors score, %(N)        | 19.4% (3,928)           | 9.7% (170)              |         |
| <b>Health behaviours score</b>         |                         |                         |         |
| Low health behaviours score, %(N)      | 19.7% (3,982)           | 21.3% (373)             | 0.02    |
| Moderate health behaviours score, %(N) | 56.3% (11,381)          | 56.8% (995)             |         |
| High health behaviours score, %(N)     | 24.0% (4,852)           | 21.9% (384)             |         |

**Table S3. HR of overall, CV, and cancer mortality by Overall CVH, health factors, and health behaviors score categories, univariate analysis. LE8: Life's Essential 8 score.**

|                              |                                 | Overall<br>(n=21,967)       | No Cancer<br>(n=20,215)     | Any Cancer<br>(n=1,752)     | P<br>interaction |
|------------------------------|---------------------------------|-----------------------------|-----------------------------|-----------------------------|------------------|
| Overall CVH                  | <b>All causes mortality*</b>    |                             |                             |                             |                  |
|                              | Low LE8 Score                   | 1                           | 1                           | 1                           |                  |
|                              | Moderate LE8 Score              | 0.52 (0.48-0.57)<br>p<0.001 | 0.48 (0.44-0.51)<br>p<0.001 | 0.73 (0.61-0.87)<br>P<0.001 | <0.001           |
|                              | High LE8 Score                  | 0.14 (0.11-0.18)<br>p<0.001 | 0.12 (0.09-0.16)<br>p<0.001 | 0.36 (0.22-0.58)<br>P<0.001 |                  |
|                              | <b>CV mortality*</b>            |                             |                             |                             |                  |
|                              | Low LE8 Score                   | 1                           | 1                           | 1                           |                  |
|                              | Moderate LE8 Score              | 0.51 (0.43-0.60)<br>p<0.001 | 0.50 (0.41-0.61)<br>p<0.001 | 0.58 (0.41-0.83)<br>p=0.003 | 0.09             |
|                              | High LE8 Score                  | 0.12 (0.07-0.20)<br>p<0.001 | 0.10 (0.06-0.19)<br>P<0.001 | 0.37 (0.15-0.93)<br>p=0.03  |                  |
|                              | <b>Cancer mortality*</b>        |                             |                             |                             |                  |
|                              | Low LE8 Score                   | 1                           | 1                           | 1                           |                  |
|                              | Moderate LE8 Score              | 0.61 (0.50-0.73)<br>p<0.001 | 0.57 (0.45-0.72)<br>p<0.001 | 0.76 (0.65-1.03)<br>p=0.08  | 0.19             |
|                              | High LE8 Score                  | 0.20 (0.13-0.31)<br>P<0.001 | 0.20 (0.12-0.34)<br>P<0.001 | 0.40 (0.18-0.87)<br>p=0.02  |                  |
| <b>All causes mortality*</b> |                                 |                             |                             |                             |                  |
| Health factors               | Low Health factors Score        | 1                           | 1                           | 1                           |                  |
|                              | Moderate Health factors Score   | 0.66 (0.61-0.72)<br>p<0.001 | 0.58 (0.53-0.64)<br>P<0.001 | 1.14 (0.95-1.36)<br>P=0.15  | <0.001           |
|                              | High Health factors Score       | 0.32 (0.27-0.37)<br>p<0.001 | 0.27 (0.22-0.33)<br>P<0.001 | 1.07 (0.79-1.46)<br>P=0.65  |                  |
|                              | <b>CV mortality*</b>            |                             |                             |                             |                  |
|                              | Low Health factors Score        | 1                           | 1                           | 1                           |                  |
|                              | Moderate Health factors Score   | 0.55 (0.47-0.66)<br>P<0.001 | 0.52 (0.43-0.63)<br>p<0.001 | 0.80 (0.56-1.16)<br>p=0.24  | 0.002            |
|                              | High Health factors Score       | 0.17 (0.12-0.26)<br>P<0.001 | 0.14 (0.09-0.23)<br>P<0.001 | 0.61 (0.29-1.28)<br>p=0.19  |                  |
|                              | <b>Cancer mortality*</b>        |                             |                             |                             |                  |
|                              | Low Health factors Score        | 1                           | 1                           | 1                           |                  |
|                              | Moderate Health factors Score   | 0.79 (0.66-0.95)<br>P=0.01  | 0.72 (0.57-0.9)<br>p=0.004  | 1.16 (0.85-1.58)<br>p=0.35  | <0.001           |
|                              | High Health factors Score       | 0.43 (0.32-0.59)<br>P<0.001 | 0.30 (0.19-0.45)<br>p<0.001 | 1.68 (1.07-2.63)<br>P=0.02  |                  |
|                              | <b>All causes mortality*</b>    |                             |                             |                             |                  |
| Health behaviors             | Low Health behaviors Score      | 1                           | 1                           | 1                           |                  |
|                              | Moderate Health behaviors Score | 0.65 (0.59-0.71)<br>P<0.001 | 0.62 (0.56-0.68)<br>p<0.001 | 0.78 (0.65-0.93)<br>p=0.006 | 0.02             |
|                              | High Health behaviors Score     | 0.26 (0.22-0.30)<br>P<0.001 | 0.23 (0.19-0.28)<br>p<0.001 | 0.36 (0.27-0.47)<br>p<0.001 |                  |
|                              | <b>CV mortality*</b>            |                             |                             |                             |                  |
|                              | Low Health behaviors Score      | 1                           | 1                           | 1                           |                  |
|                              | Moderate Health behaviors Score | 0.75 (0.63-0.90)<br>p=0.002 | 0.73 (0.59-0.89)<br>p=0.002 | 0.88 (0.59-1.30)<br>p=0.52  | 0.44             |
|                              | High Health behaviors Score     | 0.32 (0.25-0.43)<br>P<0.001 | 0.30 (0.21-0.41)<br>p<0.001 | 0.45 (0.25-0.79)<br>p=0.006 |                  |
|                              | <b>Cancer mortality*</b>        |                             |                             |                             |                  |
|                              | Low Health behaviors Score      | 1                           | 1                           | 1                           |                  |
|                              | Moderate Health behaviors Score | 0.64 (0.53-0.76)<br>P<0.001 | 0.56 (0.45-0.71)<br>P<0.001 | 0.82 (0.60-1.12)<br>p=0.21  | 0.14             |
|                              | High Health behaviors Score     | 0.31 (0.24-0.42)<br>P<0.001 | 0.3 (0.21-0.42)<br>p<0.001  | 0.37 (0.23-0.59)<br>p<0.001 |                  |

\*Reference – Low score groups; P value for PH assumption >0.05 – no significant deviation from proportionality.

Figure S1. Study flowchart.

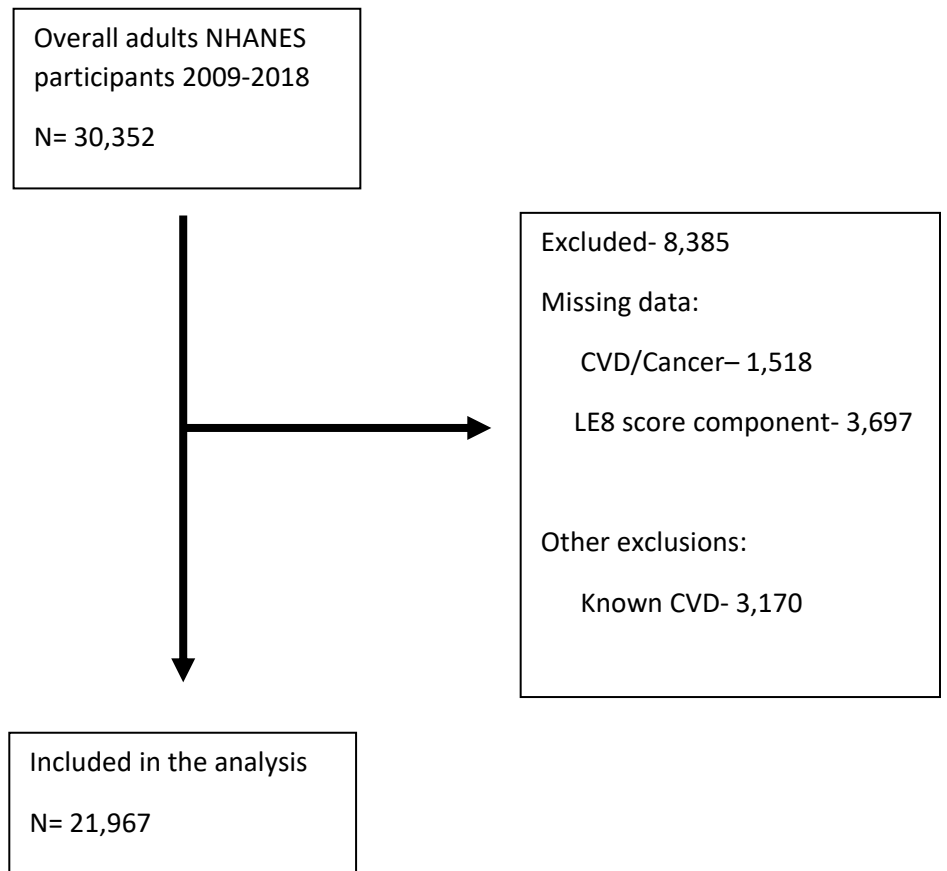

**Figure S2. Crude mortality rates by LE8 score in individuals with and without cancer.**

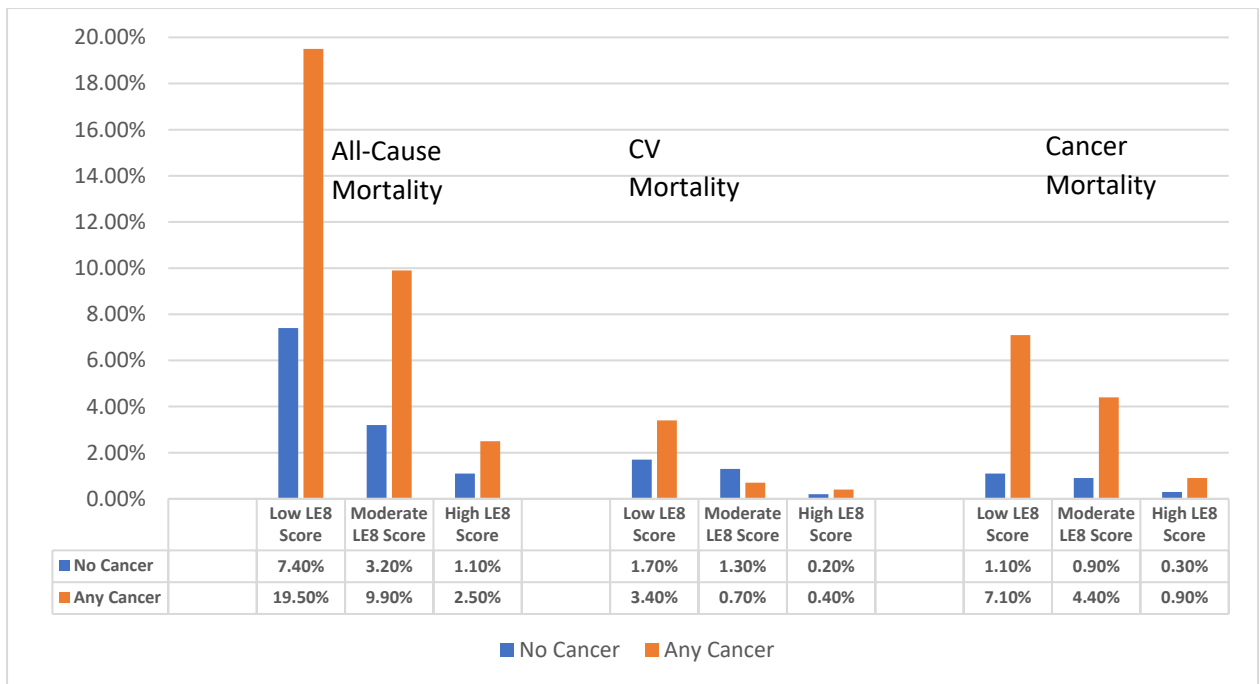

All p values for comparison any cancer vs no cancer <0.001
